# Supplementary material for: Macrophage-dependent IL-1β production induces cardiac arrhythmias in diabetic mice
Source: Nat Commun. 2016 Nov 24;7:13344. doi: 10.1038/ncomms13344 (PMC5123037; doi:10.1038/ncomms13344)
Supplement: Supplementary Information — Supplementary Figures 1-11 and Supplementary Tables 1-3. [file ncomms13344-s1.pdf]

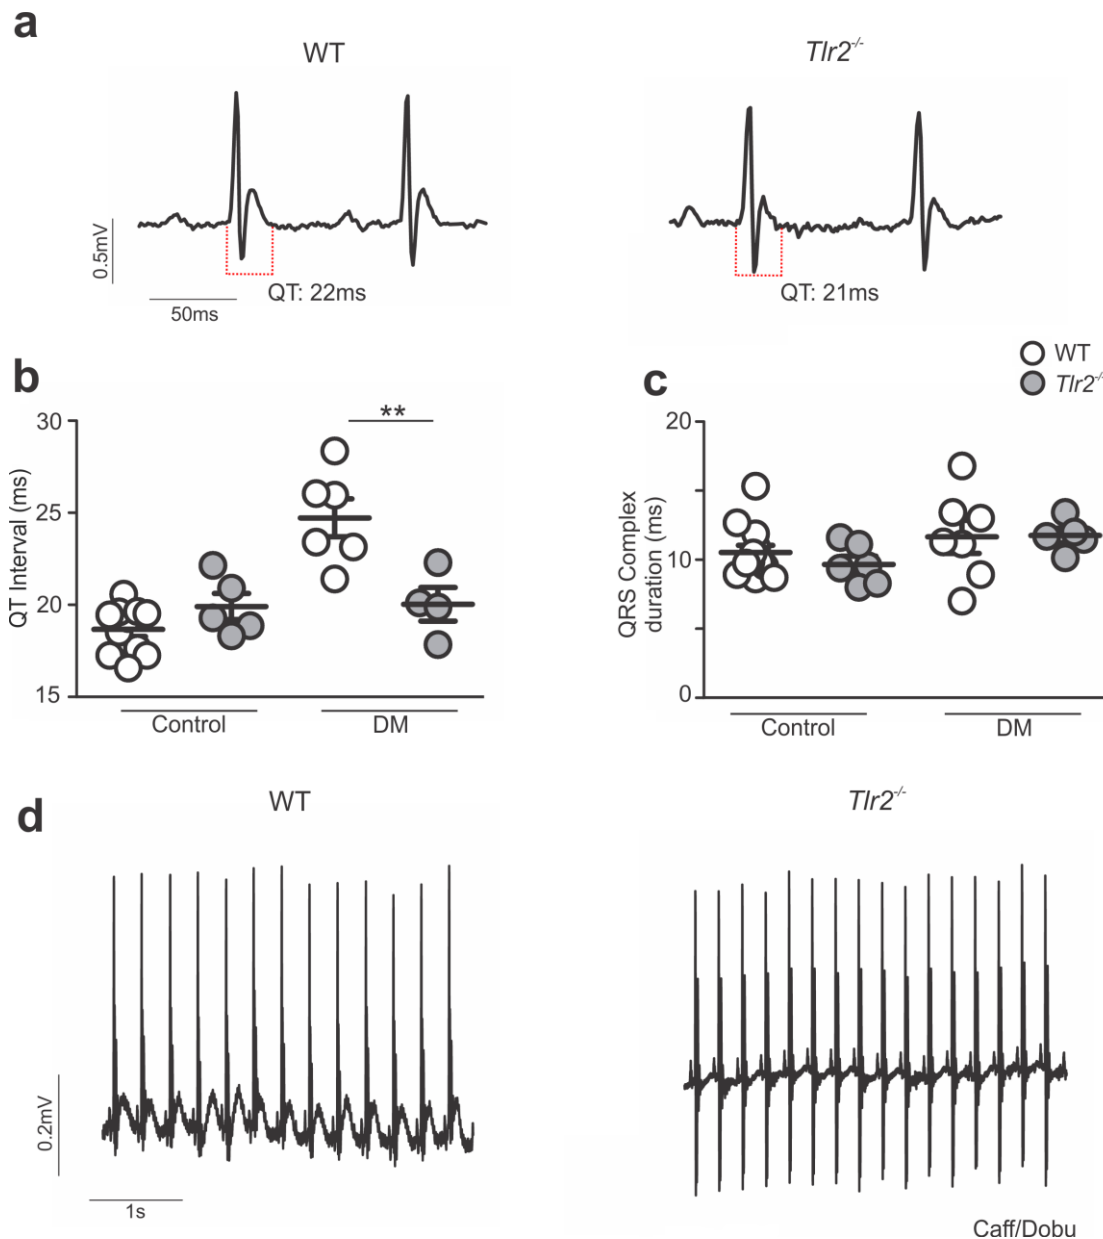

**Supplementary Figure 1** Electrocardiogram (ECG) parameters from WT and TLR2 mice.

(a) Representative ECG traces of non-diabetic WT and *Tlr2<sup>-/-</sup>* mice 60 days after vehicle. (b,c) Summary of main ECG parameters: QRS and QT interval duration. (d) Representative traces of arrhythmic vulnerability test induced by caffeine and dobutamine (Caff/Dobu) showing a normal ECG in non-diabetic WT and TLR2 mice (n=WT: 10; *Tlr2<sup>-/-</sup>*: 5; WT+DM: 6; *Tlr2<sup>-/-</sup>*+DM: 4). Scatter plot shows values from individual mice, horizontal bars are the means and error bars represents SEM. \*\* represent  $P < 0.01$  versus WT+DM (unpaired t-test).

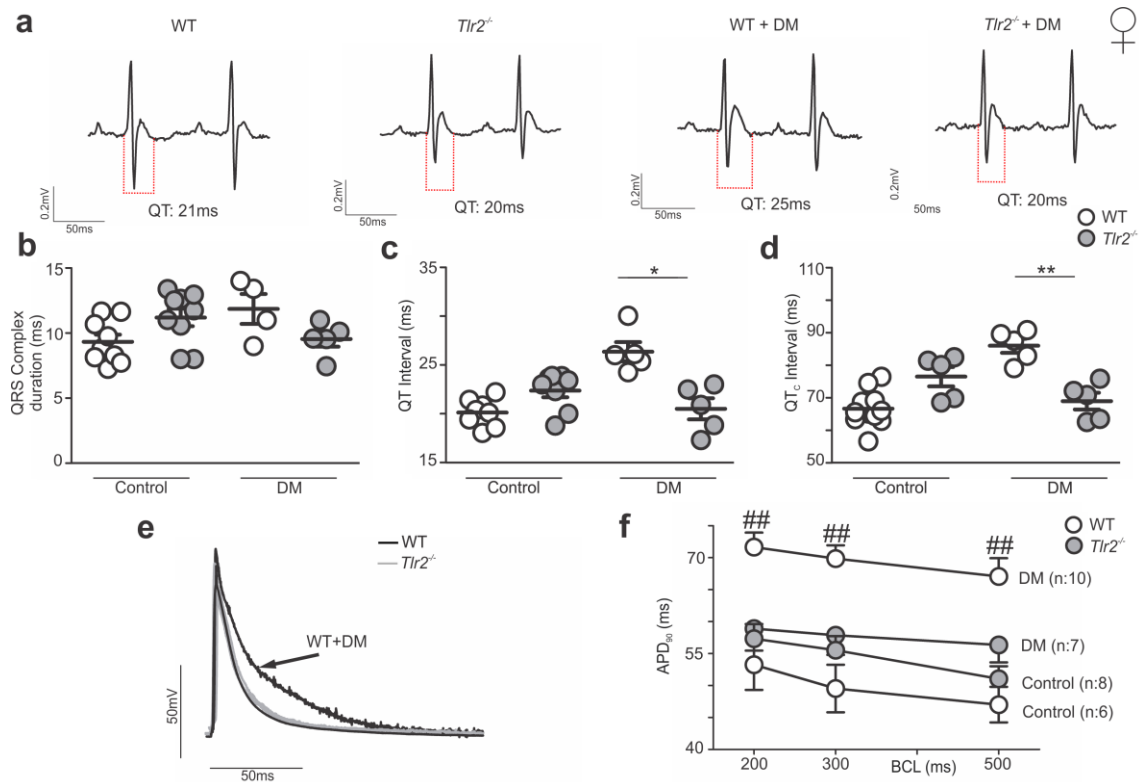

**Supplementary Figure 2** TLR2 regulates cardiac electrical alterations induced by diabetes in female mice, showing no gender specificity

(a) Representative ECG traces of experimental groups after 60 days of streptozotocin or vehicle. (b-d) Summary of main ECG parameters: QRS duration; QT interval duration and corrected QT interval (QT<sub>c</sub>) (n=WT: 8;  $Tlr2^{-/-}$ : 9; WT+DM: 5;  $Tlr2^{-/-}$ +DM: 5). (e) Representative action potential traces from left endocardium at 300 ms basic cycle length (BCL) stimulation. (f) The graph summarizes the action potential duration at 90 percent of repolarization (APD<sub>90</sub>) at different BCL. Scatter plot shows values from individual mice, horizontal bars are the means and error bars represents SEM. \* and \*\* represent, respectively,  $P < 0.05$  and  $P < 0.01$ , versus WT+DM (unpaired t-test). ## represent  $P < 0.01$  versus WT+DM (Bonferroni's *post test* following two-way ANOVA with).

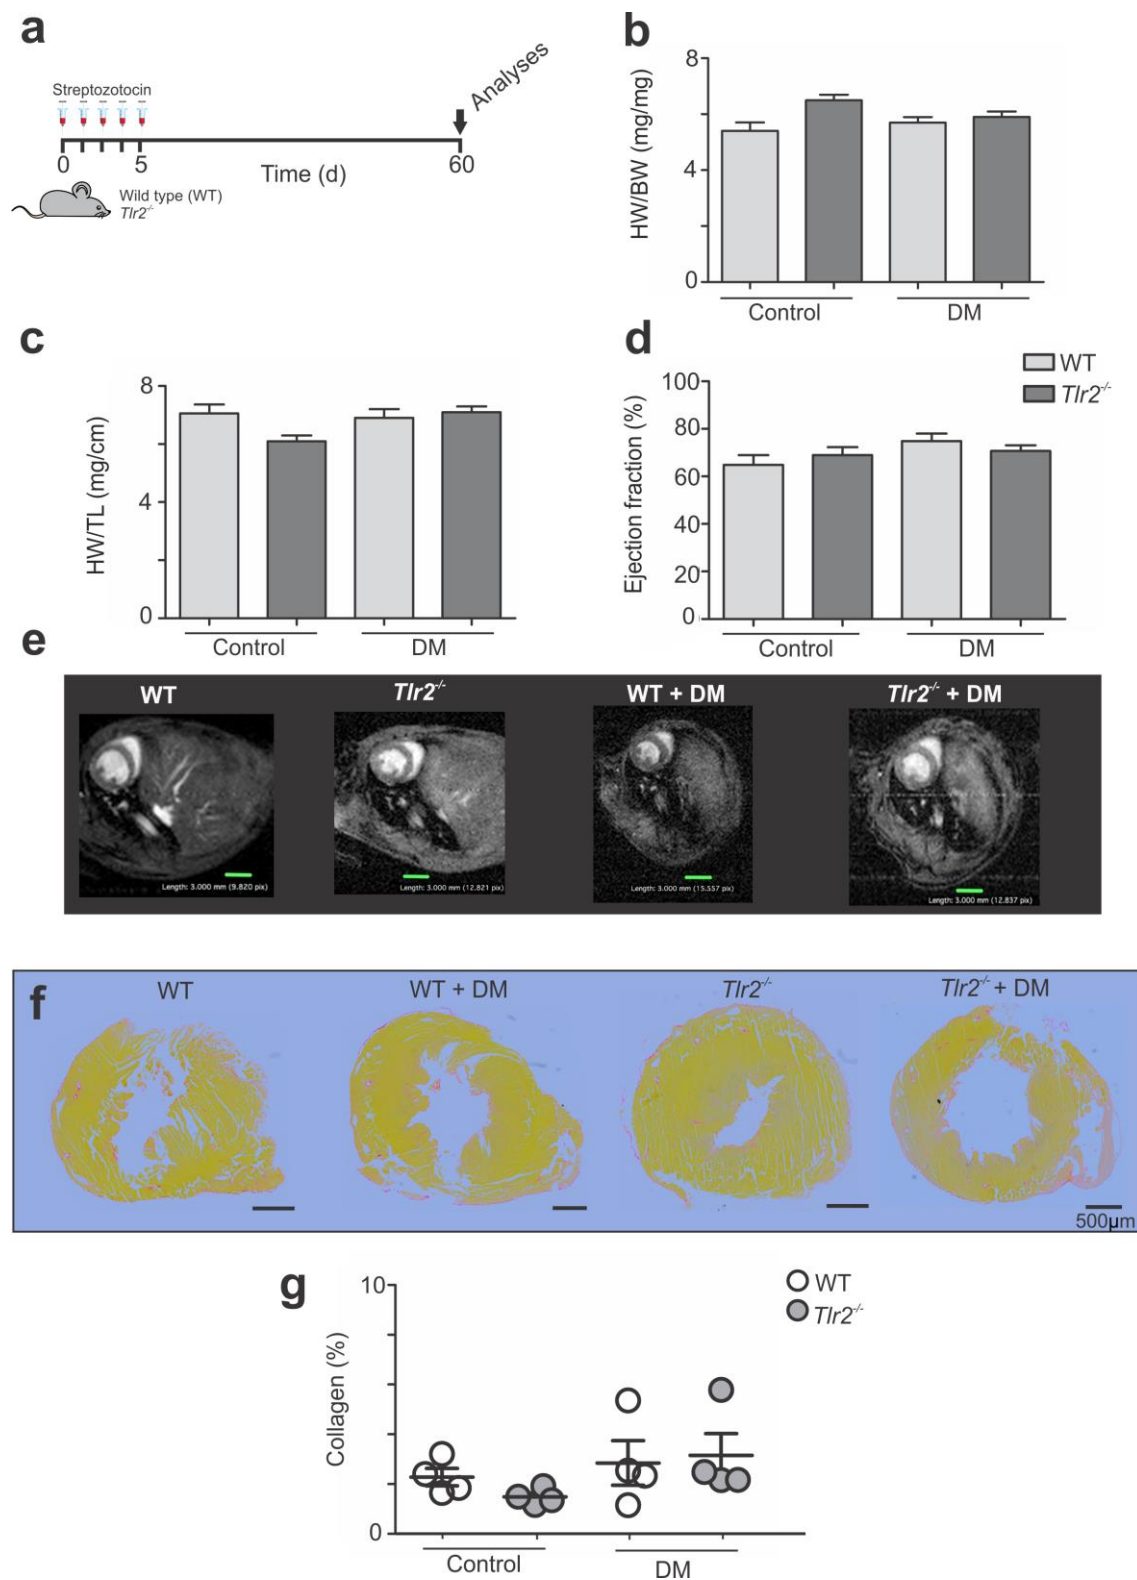

**Supplementary Figure 3** Diabetes and TLR2 do not change heart properties

(a) Experimental protocol: diabetes (DM) was induced in wild type (WT) and toll-like receptor 2 *knock-out* mice (*Tlr2*<sup>-/-</sup>) by 5 daily i.p. injections of streptozotocin (STZ) (50 mg/kg) and the parameters were analyzed 60 days after the protocol started. (b,c) Graphs summarize heart weight (HW) / body weight (BW) ratio and HW / tibia length

(TL) ratio from at least 10 mice from each experimental group. **(d)** Graph summarizes ejection fraction values from at least 4 mice from each experimental group obtained by functional 7T magnetic resonance imaging (MRI). **(e)** Representative MRI images (n=5 per group). Scale bar: 3000  $\mu$ m. **(f)** Representative images of transverse sections of the heart stained with picosirius red for collagen after 60 days of streptozotocin or vehicle. Scale bar: 500  $\mu$ m. **(g)** Graph summarizes the percentage of collagen in the heart. The results are expressed as mean  $\pm$  SEM (n=4 per group).

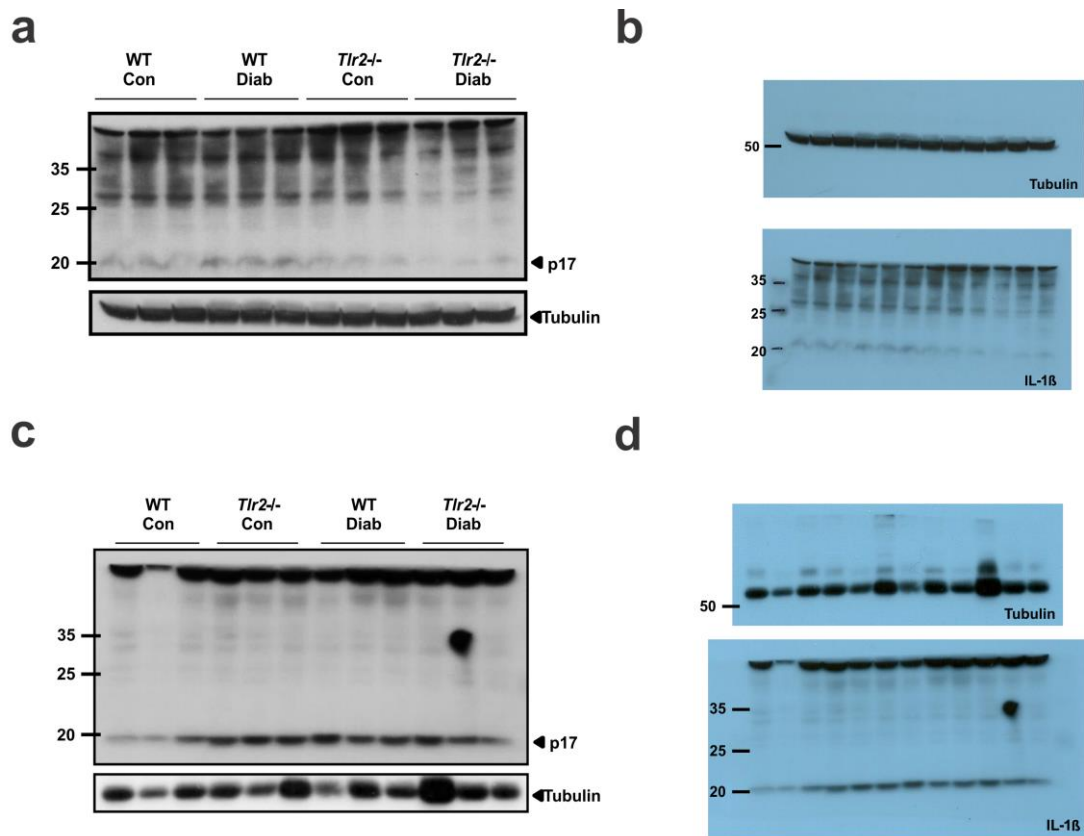

**Supplementary Figure 4** Original Images of Uncropped Western blots.

(a-d) Uncropped blots appearing in Figures 1i,j.

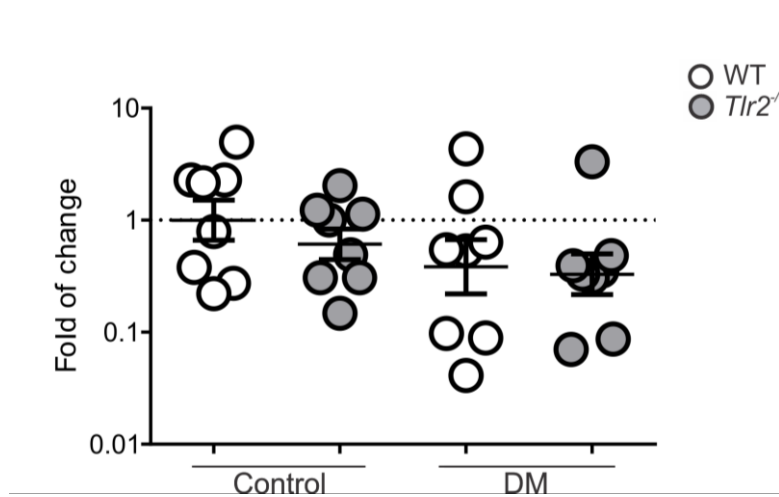

**Supplementary Figure 5** IL-1 $\beta$  gene expressions.

Cardiac IL-1 $\beta$  mRNA expression in experimental groups (n=control: 8; *Tlr2*<sup>-/-</sup>, 8; WT DM: 7; *Tlr2*<sup>-/-</sup> DM: 8). The scatter plot shows values from individual heart. Horizontal bars are the means and error bars represent SEM.

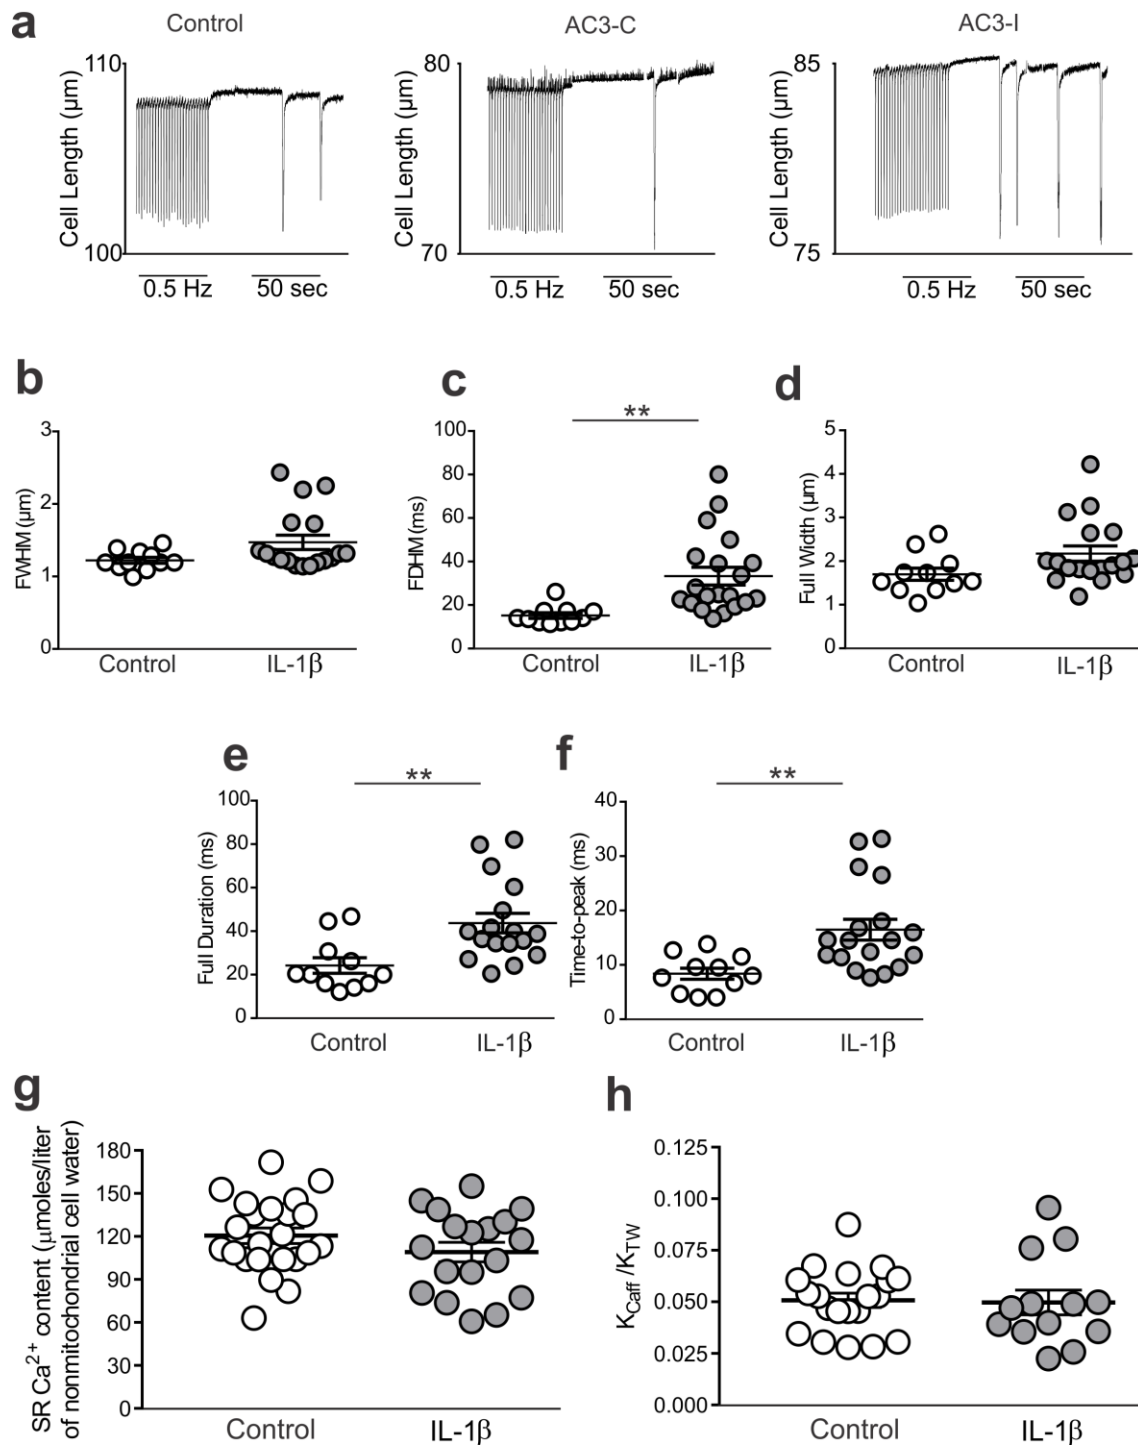

**Supplementary Figure 6** Interleukin-1 $\beta$  (IL-1 $\beta$ ) effects on isolated murine cardiomyocytes

(a) Representative traces of cell shortening in isolated mice cardiomyocyte after 24 h of dissociation, in which spontaneous contractions developed after pacing (0.5 Hz) interruption, can be observed in control situations. (b-f) Analyses of calcium sparks in cardiomyocytes after 24 h incubation in the absence or presence of IL-1 $\beta$ : (b) Full width at half-maximum amplitude (FWHM) (c) Full duration at half-maximum amplitude (FDHM). (d) Full width. (e) Full duration. (f) Time to peak. (g) Sarcoplasmic

reticulum calcium content (**h**) Ratio of the rate constant of  $[Ca^{2+}]$  decline during transients evoked by 10 mM of caffeine (K-Cf) and electrical stimulation (K-TW). The scatter plot shows values from individual cells from 4 hearts (n=11-18 cells/ group). Horizontal bars are the means and error bars represents SEM. \*, \*\* and \*\*\* represent, respectively,  $P < 0.05$ ;  $P < 0.01$  and  $P < 0.001$  (unpaired t-test). # and ## represent, respectively,  $P < 0.05$  and  $P < 0.01$ , (Bonferroni's *post* test following one-way ANOVA with). (**e**) spark fluorescence amplitude ( $F/F_0$ ).

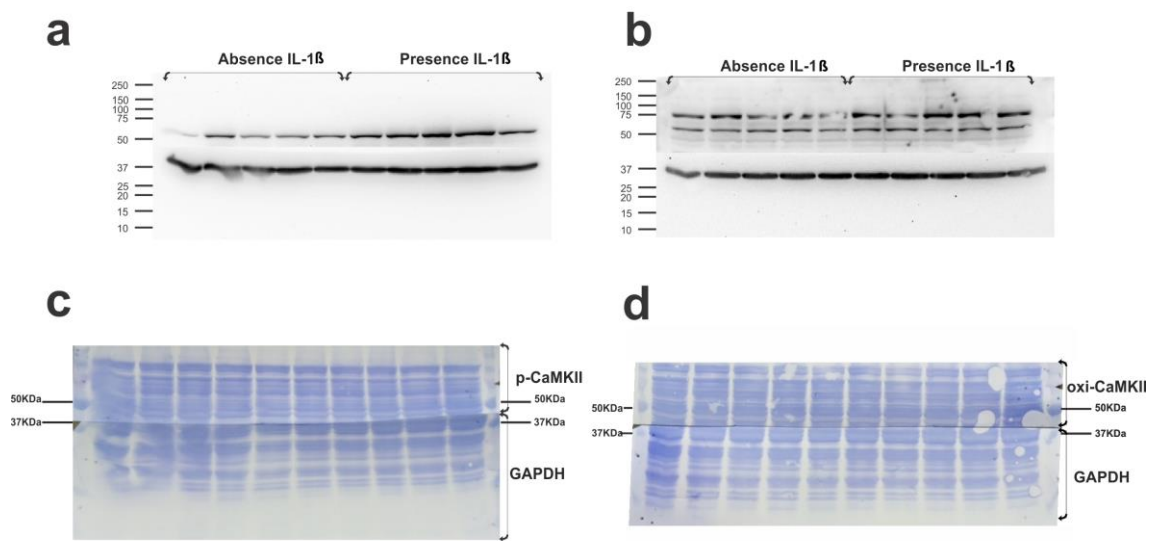

**Supplementary Figure 7** Original Images of Uncropped Western blots

(a-d) Uncropped blots appearing in Figures 3a,b

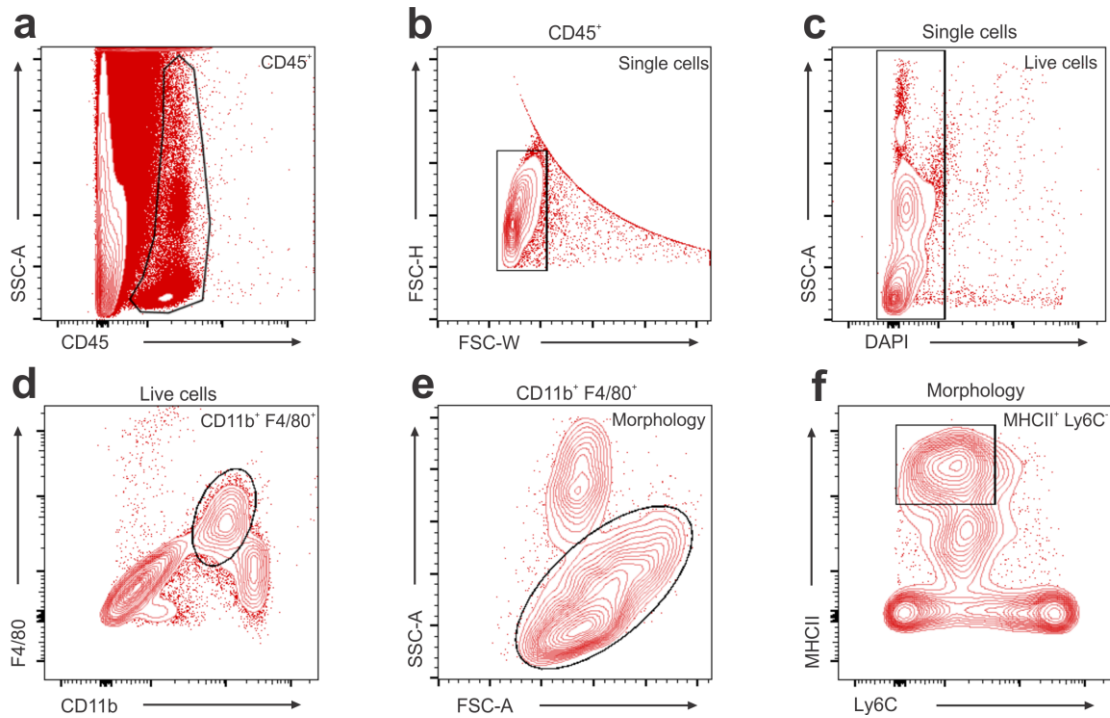

**Supplementary Figure 8** Flow cytometry gating strategy for identifying cardiac macrophages

Cardiac tissue suspensions containing single cells were prepared and labeled. (a) CD45<sup>+</sup> leukocytes were identified. (b) Doublets were excluded using FSC-H and FSC-W. (c) Using DAPI and granularity (SSC-A), dead cells were excluded. (d) Live cells were gated with F4/80<sup>+</sup> and CD11b<sup>+</sup>, further (e) cell size (FSC-A) and granularity (SSC-A) were used for cellular morphology selection, and then macrophages were identified (f) with MHC-II and Ly6c expression.

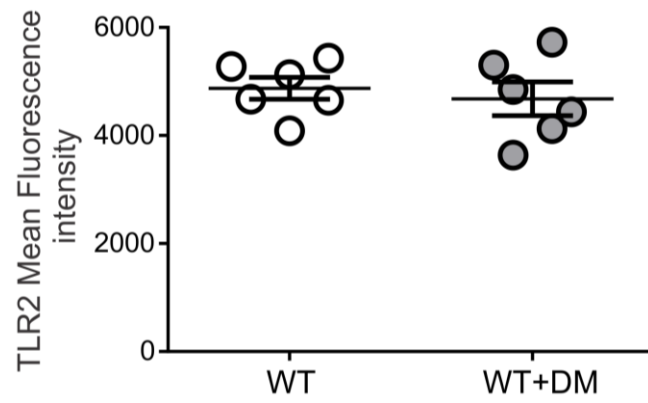

**Supplementary Figure 9** TLR2 Mean Fluorescence Intensity in cardiac macrophages.

TLR2 fluorescence intensity analyses in cardiac macrophages sorted from cardiac tissues suspensions (n=6 per group). The scatter plot shows values from individual heart. Horizontal bars are the means and error bars represent SEM.

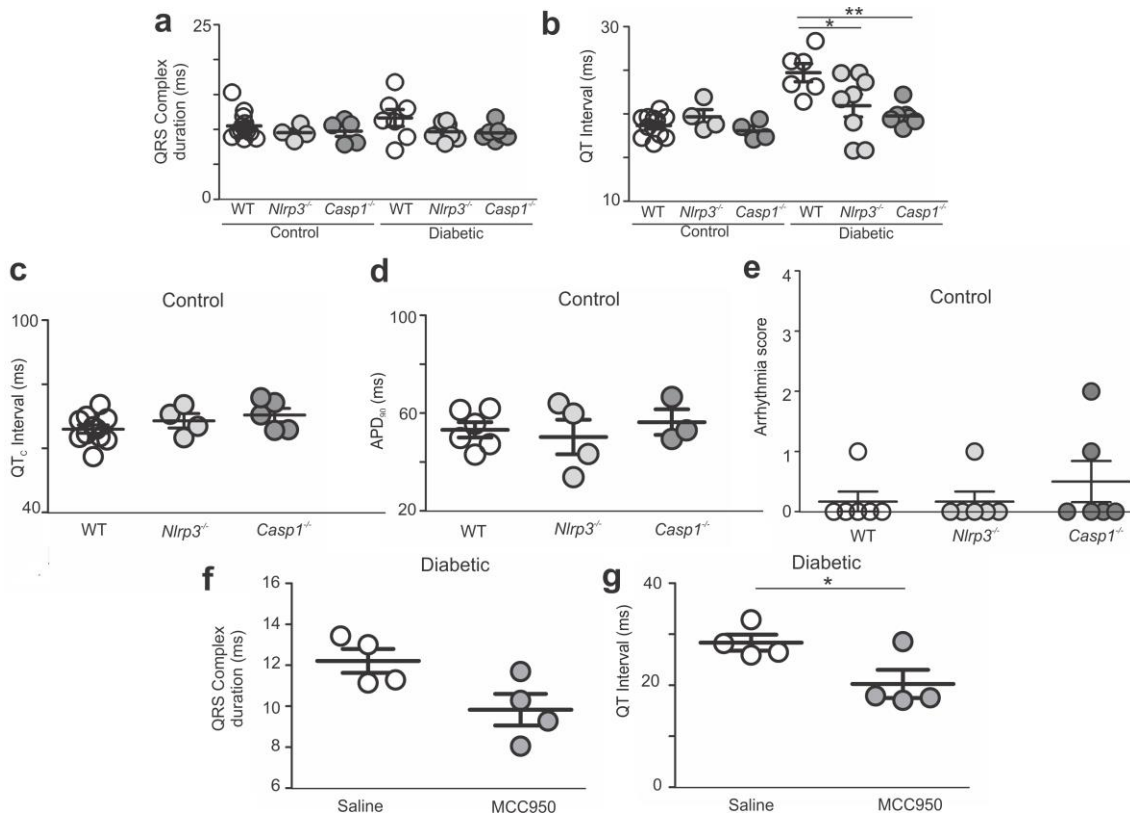

**Supplementary Figure 10** ECG parameters, action potential duration and arrhythmia vulnerability test in WT, *Nlrp3*<sup>-/-</sup>, *Casp1*<sup>-/-</sup> and MCC-950 treated mice

(a,b) Summary of main ECG parameters: QRS and QT interval duration (n=WT: 9; *Nlrp3*<sup>-/-</sup>: 4; *Casp1*<sup>-/-</sup>: 5; WT DM: 7; *Nlrp3*<sup>-/-</sup> DM: 8; *Casp1*<sup>-/-</sup> DM: 7). (c,d) The corrected QT interval and action potential duration at 90 percent of repolarization (APD<sub>90</sub>) at 300 ms BCL from non-diabetic groups (referred to **Fig. 6** of the main manuscript) (n=WT: 5; *Nlrp3*<sup>-/-</sup>: 4; *Casp1*<sup>-/-</sup>: 3). (e) Arrhythmia scores win the Caff/Dobu test in non-diabetic WT, *Nlrp3*<sup>-/-</sup> and *Casp1*<sup>-/-</sup> mice (n=WT: 6; *Nlrp3*<sup>-/-</sup>: 6; *Casp1*<sup>-/-</sup>: 6). (f,g) Summary of QRS and QT interval duration in diabetic mice treated for 14 days with saline or MCC-950 (n=4/ per group). Scatter plot shows values from individual mice, horizontal bars are the means and error bars represents, respectively, SEM. \* and \*\* represent  $P < 0.05$  and  $P < 0.01$  (unpaired t-test).

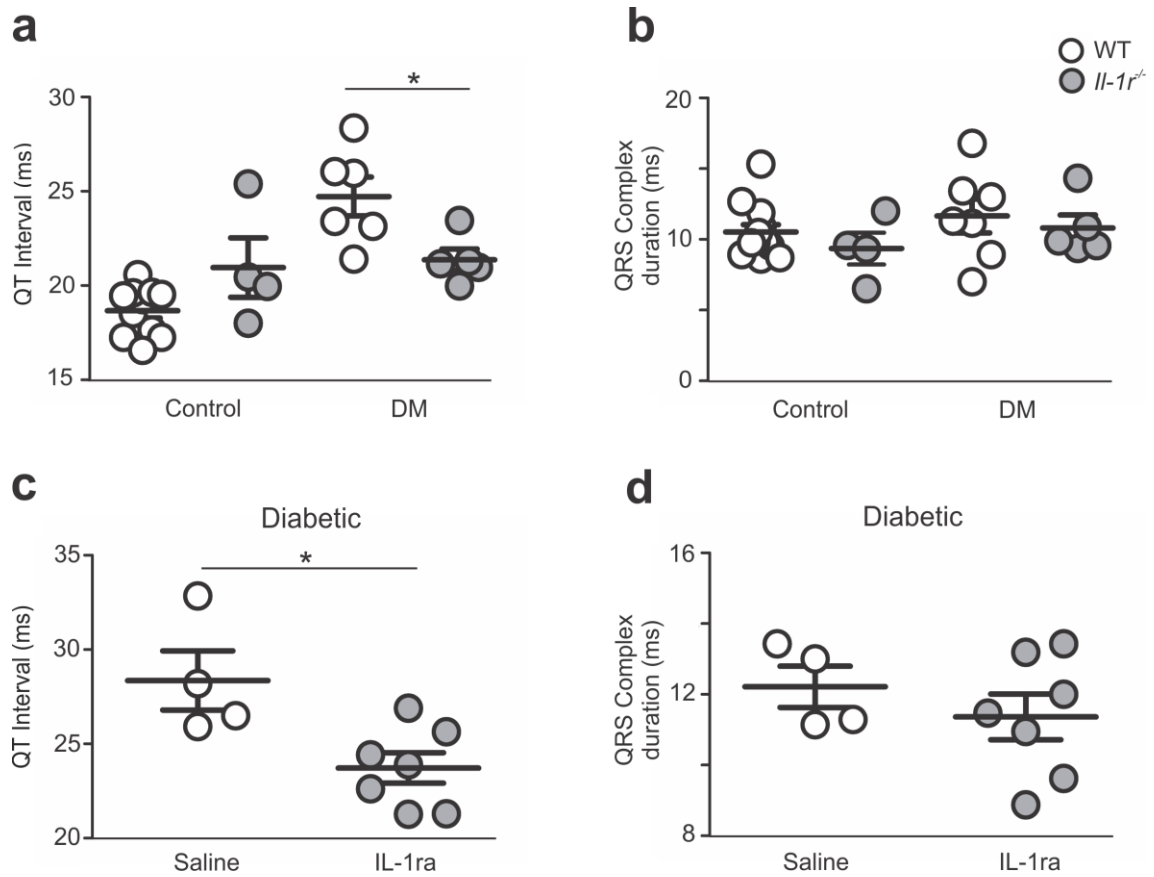

**Supplementary Figure 11** ECG parameters and arrhythmia vulnerability test in *IL-1r<sup>-/-</sup>* mice and in WT mice treated with IL-1ra

(a,b) QT interval and QRS duration in WT and *IL-1r<sup>-/-</sup>* mice (n=WT: 9; *IL-1r<sup>-/-</sup>*: 4; WT DM: 7; *IL-1r<sup>-/-</sup>* DM: 5) (c,d) QT interval and QRS duration in WT diabetic mice treated for 14 days with saline or IL-1ra (n=Saline: 4; IL-1ra: 7). Scatter plot shows values from individual mice, horizontal bars are the means and error bars represent SEM. \* represent  $P < 0.05$  (unpaired t-test).

Supplementary Table 1. Blood Glucose and Insulin levels

|                     | WT         | WT+DM           | <i>P</i> value | <i>TRL2</i> <sup>-/-</sup> | <i>TRL2</i> <sup>-/-</sup><br>+DM | <i>P</i> value |
|---------------------|------------|-----------------|----------------|----------------------------|-----------------------------------|----------------|
| Glucose<br>(mg/dL)  | 102.6 ±5.2 | 343.3<br>± 37.7 | 0.0006         | 95.29<br>± 2.9             | 471.0<br>± 26.9                   | < 0.0001       |
| Insulin<br>(μIU/mL) | 12.7 ± 0.7 | 10.1 ± 0.9      | 0.0471         | 11.0 ± 0.5                 | 9.5 ± 0.4                         | 0.0741         |

**n:** WT: 7; WT+DM: 8; *Tlr2*<sup>-/-</sup>: 6; *Tlr2*<sup>-/-</sup>+DM: 6.

Supplementary Table 2. Blood Glucose and Insulin levels and Cardiac Biometry

|                    | <i>Nlrp3</i> <sup>-/-</sup> | <i>Nlrp3</i> <sup>-/-</sup><br>+DM | <i>P</i> value | <i>Casp1</i> <sup>-/-</sup> | <i>Casp1</i> <sup>-/-</sup><br>+DM | <i>P</i> value |
|--------------------|-----------------------------|------------------------------------|----------------|-----------------------------|------------------------------------|----------------|
| Glucose<br>(mg/dL) | 132.6<br>± 9.4              | 361.0<br>± 20.3                    | < 0.0001       | 122.8<br>± 6.0              | 337.4<br>± 30.7                    | 0.0006         |
| Insulin<br>(μU/mL) | 12.7 ± 1.4                  | 10.2 ± 0.8                         | 0.1761         | 16.7 ± 2.5                  | 10.9 ± 1.0                         | 0.0542         |
| HW/BW<br>(mg/g)    | 6.4 ± 0.4                   | 5.9 ± 0.2                          | 0.3894         | 6.5 ± 0.6                   | 6.4 ± 0.3                          | 0.7787         |
| HW/TL<br>(mg/cm)   | 8.2 ± 0.6                   | 7.2 ± 0.3                          | 0.1449         | 9.1 ± 0.7                   | 8.4 ± 0.6                          | 0.4538         |

For glucose and Insulin: **n**: *Nlrp3*<sup>-/-</sup>: 7; *Nlrp3*<sup>-/-</sup>+DM: 6; *Casp1*<sup>-/-</sup>: 7; *Casp1*<sup>-/-</sup>+DM: 7. For Cardiac Biometry: **n**: *Nlrp3*<sup>-/-</sup>: 9; *Nlrp3*<sup>-/-</sup>+DM: 11; *Casp1*<sup>-/-</sup>: 9; *Casp1*<sup>-/-</sup>+DM: 13.

Supplementary Table 3. Blood Glucose and Insulin levels and Cardiac Biometry

|                     | <i>IL-1r<sup>-/-</sup></i> | <i>IL-1r<sup>-/-</sup></i> +DM | <i>P</i> value |
|---------------------|----------------------------|--------------------------------|----------------|
| Glucose<br>(mg/dL)  | 143.3<br>± 13.1            | 387.7 ± 25.3                   | < 0.0001       |
| Insulin<br>(μIU/mL) | 12.9 ± 1.3                 | 9.0 ± 0.9                      | 0.0403         |
| HW/BW (mg/g)        | 5.4 ± 0.2                  | 5.2 ± 0.3                      | 0.4400         |
| HW/TL (mg/cm)       | 6.5 ± 0.2                  | 7.1 ± 0.4                      | 0.2872         |

For glucose and Insulin: **n:** *IL-1r<sup>-/-</sup>*: 6; *IL-1r<sup>-/-</sup>*+DM: 6. For Cardiac Biometry: **n:** *IL-1r<sup>-/-</sup>*: 5; *IL-1r<sup>-/-</sup>*+DM: 5.
